# Supplementary material
Source: publisher figshare collection journal article supplement (https://gsajournals.figshare.com/articles/dataset/_/6307136)
Supplement: Supplementary file 1 [file 1]

## Sheet: Sheet1
Table S2. List of all oligonucleotides used in this study, with the corresponding sequence and function.
Primer name	Primer sequence (5’–3’)	Primer target/function
Cue2 FW1	CTGCTACGATACACTGTGTTG	Making fragment 1 for cue2 mutagenesis
Cue2 FW2	CTGGCGAAAGATACTGGTCT	Genotyping wild type allele cue2
Cue2 FW3	CAAATTCTTCGACGCAGACC	Sequencing for cue2-1 mutation
Cue2 Kan FW1	GTTTAAACGAGCTCGAATTCCCAACTGCGTTAACATGTTAC	Making fragment 3 for cue2 mutagenesis
Cue2 Kan RV1	TTAATTAACCCGGGGATCCGTACAATTGCAAGAACTAGCGC	Making fragment 1 for cue2 mutagenesis
Cue2 RV1	ACCAAGAATCTATTGAAACCC	Making fragment 3 for cue2 mutagenesis
Cue2 RV2	TCTGATACGTCTCCTAACCC	Genotyping cue2 deletion
Elf_FW1	GGTGCTGGTAAATCAACGCT	Making fragment 1 for elf1-CD deletion
Elf1_Del_FW	TCAATAGTTGTCCTCCACCAAG	Amplifying entire deletion fragment in existing elf1Δ strain, used with Elf1_RV2
Elf1_Del_FW1	TAACAGAGTAGTAGTAAAAAATCCC	Making fragment 1 for elf1 mutagenesis, used with Elf1_Del_RV1
Elf1_Del_FW2	CGAGCTCGAATTCATCGATTCTTCTCTGATGATGAAG	Making fragment 3 for elf1 mutagenesis, used with Elf1_Del_RV2
Elf1_Del_RV1	TTAATTAACCCGGGGATCCGGACATCGTCCTCTTCGTAACCCTG	Making fragment 1 for elf1 mutagenesis, used with Elf1_Del_FW1
Elf1_Del_WtChk_RV	TCCCGACTTCTTATTGCGAGC	Genotyping wild type allele elf1, used with Elf1_Del_FW1
Elf1_FW2	GAA GGT CTC GGT TTC CGT GAA TTG	Making fragment 3 for elf1-CD deletion
Elf1_RV1	CAATTCACGGAAACCGAGACCTTCGCCATTGACCGTAATATCACGC	Making fragment 1 for elf1-CD deletion
Elf1_RV2	ACGATACCATCCACCAAGTTC	Making fragment 3 for elf1-CD deletion
Elf1_RV3	TACATAGTTCTCTTGACACC	Genotyping Elf1 deletion (with Kan3 or Nat3)
Elf1-CD_check	CAA TTC ACG GAA ACC GAG ACC TTC	Genotyping elf1-CD deletion
Kan_Fwd	CGGATCCCCGGGTTAATTAA	Amplifying KanMX cassette
Kan2	ATCATTGGCAACGCTACCTT	Genotyping N-terminal tags
Kan3	GCGCAATCACGAATGAATAA	Genotyping C-terminal tags
Mlo3 RV2	GCAATATGACCCAATACACACC	Genotyping mlo3 deletion
NAT2	GGTGTCGGTGGTGAAGGACC	Genotyping N-terminal tags
Nat2-S2	ATCGATGAATTCGAGCTCG	Amplifying NatN2 cassette
NAT3	TGCCCTGCCCCTAATCTCGA	Genotyping C-terminal tags
Otr1 Fw	GTTGTTGAGTGCTGTGGATCTC	Genotyping Otr1R(Sph1)::ura4+
Otr1 RV1	CGATAAGACTTGTAACATGAAG	Genotyping Otr1R(Sph1)::ura4+
Rad52 FW1	CGTTGGCAATGCTGTGACTG	Amplifying rad52-GFP from gifted tagged strain
Rad52 RV1	GTTCCTCTTATAGTTGGTACCTGC	Amplifying rad52-GFP from gifted tagged strain
Rnh1FW1	GTCCAGATATGTGACATTTCC	Making fragment 1 for rnh1 mutagenesis
Rnh1FW2	CGAGCTCGAATTCATCGATGTAATCAACAAGCCGATATGC	Making fragment 3 for rnh1 mutagenesis
Rnh1RV1	TTAATTAACCCGGGGATCCGCACGCTTATTTCCACC	Making fragment 1 for rnh1 mutagenesis
Rnh1RV2	GACTGCCGTTAAGACACCGAACC	Making fragment 3 for rnh1 mutagenesis
Rnh1RV3	CTACCTATTAACTGTGAATGTTC	Genotyping wild type allele rnh1
Rnh1WTchkFW	ACATCTGGCGATTTGACCATCC	Genotyping wild type allele rnh1
Rnh201FW1	CATCGTTTTACCGTAGTACCGC	Making fragment 1 for rnh201 mutagenesis
Rnh201FW2	CGAGCTCGAATTCATCGATCGTTCGTGGTTTGGATCAGAG	Making fragment 3 for rnh201 mutagenesis
Rnh201RV1	TTAATTAACCCGGGGATCCGGAAGAGTTATTGTCACTGACTAG	Making fragment 1 for rnh201 mutagenesis
Rnh201RV2	CTCAATAAACAGAGCAGAAGCCTGG	Making fragment 3 for rnh201 mutagenesis
Rnh201RV3	CAGGTTTTTGAGCAGCATCAAC	Genotyping wild type allele rnh201
Rnh201WTchkFW	GATTGGCACGAAGATGACG	Genotyping wild type allele rnh201
Rpl2701_RV2	CCTCGTCTCATCGTCGTCAC	Genotyping rpl2702 deletion
Rpl2702 FW1	TTGTCTGTAGTGTCCAAAAGC	Making fragment 1 for rpl2702 mutagenesis
Rpl2702 FW2	CAAGGCTCTATCTTACATCAC	Genotyping wild type allele rpl2702, and for sequencing rpl2702 mutation
Rpl2702 Kan FW1	GTTTAAACGAGCTCGAATTCTCGGGAACAGGTTTTTGTATG	Making fragment 3 for rpl2702 mutagenesis
Rpl2702 Kan RV1	TTAATTAACCCGGGGATCCGTGGGTTTTGGTGACTTTTGAG	Making fragment 1 for rpl2702 mutagenesis
Rpl2702 RV1	TCTTCCACGTCAGCAAATCC	Making fragment 3 for rpl2702 mutagenesis
Rrp6 3' rv2	CACGAATCTTTACGACATGC	Genotyping rrp6 deletion
Ura4DS/E#1	GAGGGGATGAAAAATCCCAT	genotyping full length or DS/E ura4+ allele
Ura4DS/E#2	TTCGACAACAGGATTACGACC	genotyping full length or DS/E ura4+ allele
