# Supplementary material
Source: publisher figshare collection journal article supplement (https://gsajournals.figshare.com/articles/dataset/_/6307136)
Supplement: Supplementary file 2 [file 1]

**Figure S1**

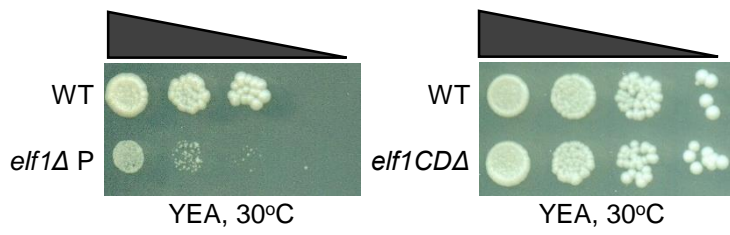

**Figure S2**

**A Haploid Cells**

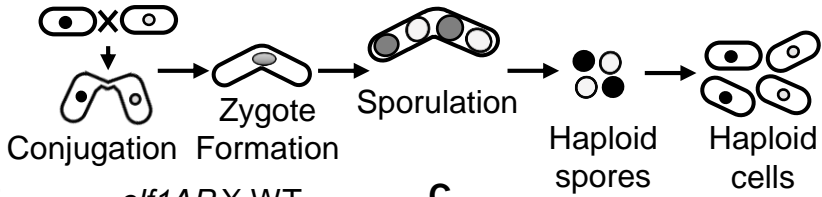

**B** *elf1ΔP* X WT

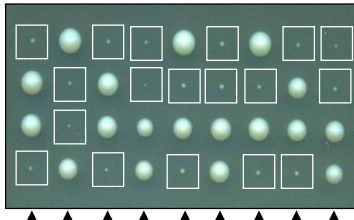

**C**

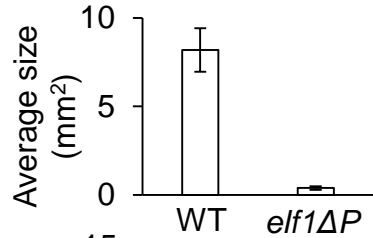

**D** *elf1ΔS* X WT

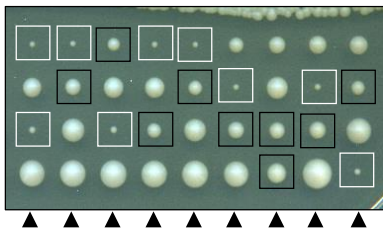

**E**

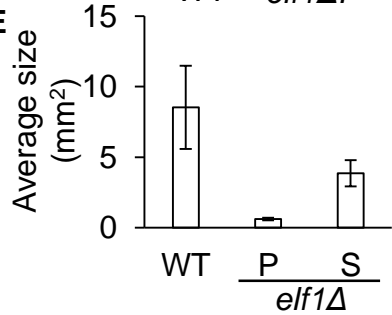

**F** *elf1ΔS* X *elf1ΔS*

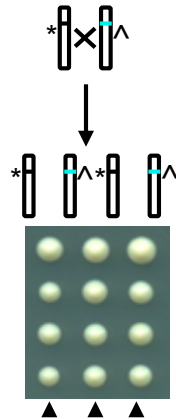

**G** *elf1ΔS* X *elf1ΔS*

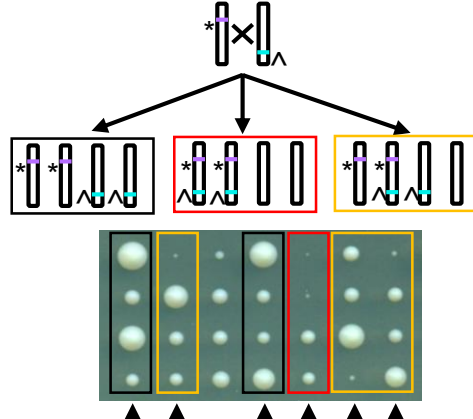

Figure S3

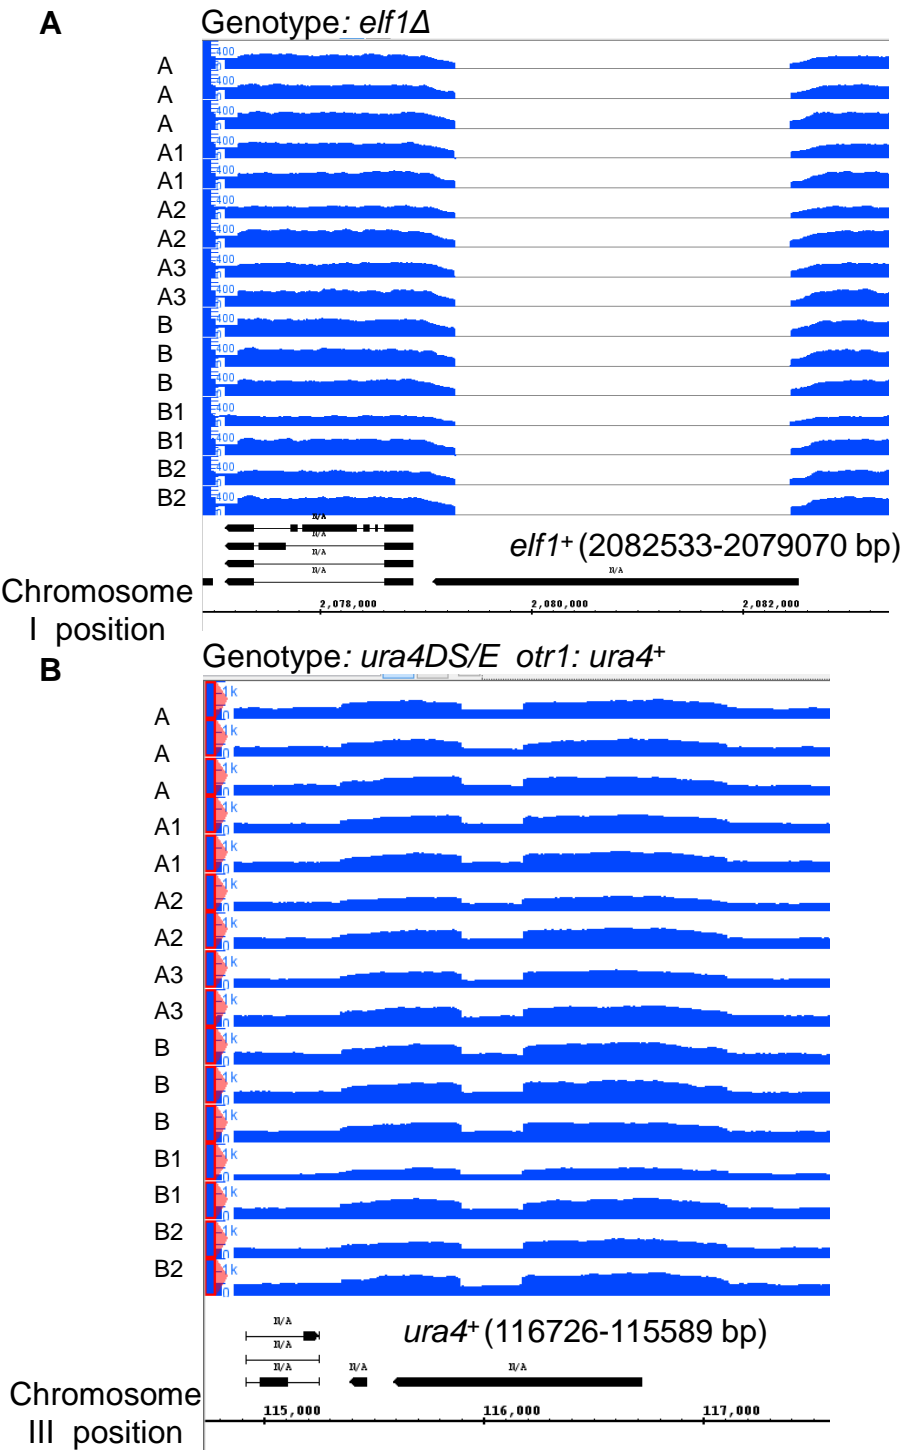

**Figure S4**

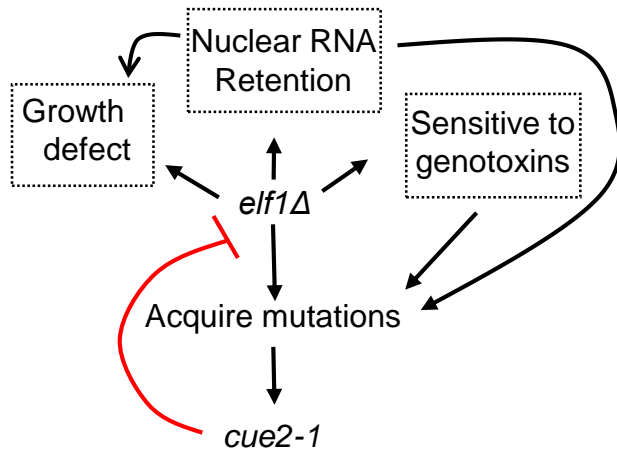

## Supporting Figure legends

### Figure S1

Although *elf1* $\Delta$  cells exhibit severe growth defects, cells without the Elf1 chromodomain (*elf1CD* $\Delta$ ) do not display an obvious growth defect. A 10-fold serial dilution assay was performed using cells with indicated genotypes. Cells were grown on YEA rich media for 6 days before imaging.

### Figure S2

S strains contain heritable genetic alterations that suppress the *elf1* $\Delta$  P phenotype and are not in linkage with *elf1*<sup>+</sup>. (A) Illustration of the process of mating two haploid cells with different mutations, indicated by gray and black nuclei. Resulting spores are separated into vertical tetrads, then allowed to progress into haploid cells forming colonies. (B) Daughter tetrads from wild-type strains were crossed with *elf1* $\Delta$  P strains. (C) Average sizes of the resulting colonies from (B) were calculated. (D) Daughter tetrads from wild-type strains crossed with *elf1* $\Delta$  S strains. (E) Average sizes of the resulting colonies from (C) were determined. (B & D) Vertical tetrads correspond to colonies grown from the each of the four haploid spores of the mated haploid parental strains, indicated by triangles. Resulting P colonies are outlined with white boxes, and S colonies are outlined with black boxes. (C & E) Error bars indicate  $\pm 1$  standard deviation. (F-G) Illustration of possible chromosome segregation outcomes after mating two S strains containing either single suppressor mutation in the same locus (F) or in separate loci (G). Hypothetical mutant loci are indicated by purple or blue lines. The possible combinations of the different segregated suppressors are boxed with different colors and the corresponding tetrads are boxed with the same color (black, red or yellow).

### Figure S3

Integrated Genome Browser (IGB) showing the alignment of genome sequencing reads along the chromosome position. (A) *elf1*<sup>+</sup> genomic locus is deleted in all observed strains. (B) A truncated *ura4* (*ura4DS/E*) and a full length *ura4*<sup>+</sup> reporter gene (*otr1: ura4*<sup>+</sup>) are detected.

### Figure S4

Genome instability caused by loss of Elf1 may accelerate the acquisition of additional mutations that suppress the *elf1* $\Delta$  phenotype, a model.
